# Supplementary material for: SynBlast: Assisting the analysis of conserved synteny information
Source: Springer Nature journal article supplement (doi:10.1186/1471-2105-9-351), 2008-08-24

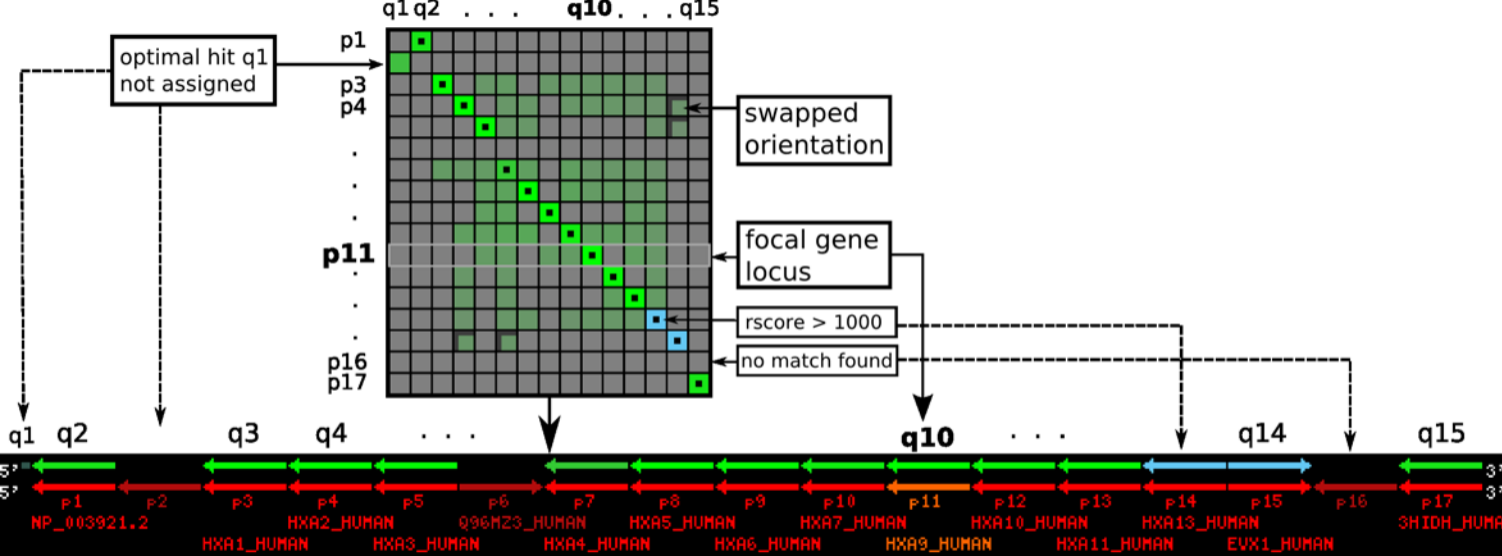

Supplement: 12859_2008_2336_MOESM2_ESM.pdf [file 12859_2008_2336_MOESM2_ESM.pdf]
