# Supplementary material for: SynBlast: Assisting the analysis of conserved synteny information
Source: Springer Nature journal article supplement (doi:10.1186/1471-2105-9-351), 2008-08-24
Supplement: 12859_2008_2336_MOESM4_ESM.pdf [file 12859_2008_2336_MOESM4_ESM.pdf]

| cl.  | species | rscore | logRatioSum  | chr/contig   | start       | end         | ori                 | remarks                                                            |                                         |
|------|---------|--------|--------------|--------------|-------------|-------------|---------------------|--------------------------------------------------------------------|-----------------------------------------|
| A    | Hs      | 17000  | 69.29        | 7            | 27 100 587  | 27 252 566  | +                   | -A1 -A2 -A3 -A4 -A5 -A6 -A7 -A9 -A10 -A11 -A13 +Evx1<br>no A4      |                                         |
|      | Mmul    | 12923  | 39.03        | 3            | 98 980 072  | 99 131 580  | -                   |                                                                    |                                         |
|      | Mmus    | 12736  | 36.2         | 6            | 52 086 320  | 52 246 674  | +                   |                                                                    |                                         |
|      | Cf      | 11893  | 26.62        | 14           | 43 224 741  | 43 377 670  | +                   |                                                                    |                                         |
|      | Bt      | 5933   | 15.23        | 4            | 37 098 097  | 37 159 206  | -                   | only A1-A7 (missassembly)                                          |                                         |
|      | Bt      | 5201   | 14.53        | 4            | 40 097 176  | 40 179 376  | -                   | only A9-Evx1 (missassembly)                                        |                                         |
|      | Md      | 10929  | 18.72        | 8            | 293 153 229 | 293 354 376 | -                   |                                                                    |                                         |
|      | Xt      | 9118   | 9.35         | scaffold_56  | 1 323 527   | 1 481 226   | -                   |                                                                    |                                         |
|      | Gg      | 7735   | 7.02         | 2            | 32 513 673  | 32 659 744  | +                   |                                                                    |                                         |
|      | Tr-a    | 4511   | 1.44         | scaffold_12  | 2 318 841   | 2 382 351   | +                   | no A6, no A7* assigned; no Evx1 (scaffold end)<br>only A5,A13,Evx1 |                                         |
|      | Tr-a    | 2379   | 1.81         | scaffold_346 | 186 282     | 226 444     | +                   |                                                                    |                                         |
|      | Ol-a    | 6577   | 3.84         | 11           | 10 492 587  | 10 572 561  | +                   | A6 not assigned (overlap?)                                         |                                         |
|      | Ga-a    | 6508   | 3.65         | groupX       | 9 855 280   | 9 936 730   | +                   | A6 not assigned (overlap?)                                         |                                         |
|      | Tn-a    | 5915   | 2.95         | 21           | 2 978 001   | 3 053 406   | -                   | A6*,A7 not assigned                                                |                                         |
|      | Dr-a    | 4687   | 1.55         | 19           | 13 885 840  | 13 954 135  | -                   | A10 not assigned; A2 weak; (A6,A7)* not assigned                   |                                         |
|      | Dr-b    | 3874   | 3.15         | 16           | 21 167 725  | 21 201 582  | -                   | no (A1,A3-A7,Evx1)*                                                |                                         |
| Ga-b | 3356    | 2.25   | groupXX      | 9 710 597    | 9 734 368   | -           | no (A1,A3-A7,Evx1)  |                                                                    |                                         |
| Tr-b | 3220    | 1.78   | scaffold_48  | 1 056 655    | 1 085 990   | +           | no (A1,A3-A7,Evx1)* |                                                                    |                                         |
| Tn-b | 3198    | 1.76   | 8            | 6 606 129    | 6 627 504   | -           | no (A1,A3-A7,Evx1)* |                                                                    |                                         |
| Ol-b | 3184    | 1.7    | 16           | 13 115 192   | 13 137 443  | -           | no (A1,A3-A7,Evx1)* |                                                                    |                                         |
| B    | Hs      | 12998  | 52.47        | 17           | 43 961 911  | 44 160 954  | +                   | -B1 -B2 -B3 -B4 -B5 -B6 -B7 -B8 -B9 -B13                           |                                         |
|      | Mmul    | 11658  | 32.53        | 16           | 32 758 430  | 32 953 359  | +                   |                                                                    |                                         |
|      | Cf      | 10240  | 26.34        | 9            | 28 119 786  | 28 287 966  | +                   |                                                                    |                                         |
|      | Mmus    | 9660   | 24.67        | 11           | 96 010 533  | 96 183 226  | -                   |                                                                    |                                         |
|      | Md      | 7560   | 10.78        | 2            | 201 105 049 | 201 365 724 | +                   |                                                                    |                                         |
|      | Bt      | 4007   | 1.39         | 19           | 31 195 622  | 31 242 559  | +                   | no B1-B3; B13 not assigned (slice inverted)                        |                                         |
|      | Bt      | 2532   | 4.02         | 19           | 30 587 810  | 30 608 457  | +                   | B1-B3 (separated due to size constraint)                           |                                         |
|      | Dr-a    | 5955   | 2.8          | 3            | 22 929 837  | 23 046 057  | +                   |                                                                    |                                         |
|      | Xt      | 5242   | -0.2         | scaffold_334 | 486 967     | 589 462     | +                   |                                                                    |                                         |
|      | Tr-a    | 4398   | -2.92        | scaffold_41  | 501 893     | 661 535     | +                   |                                                                    |                                         |
|      | Tn-a    | 4290   | -0.11        | Un_random    | 38 028 407  | 38 178 153  | +                   |                                                                    |                                         |
|      | Gg      | 3940   | 2.52         | 27           | 3 518 760   | 3 641 313   | +                   |                                                                    |                                         |
|      | Ol-a    | 3779   | -1.11        | 8            | 24 280 265  | 24 441 965  | -                   |                                                                    |                                         |
|      | Ga-a    | 3714   | -1.1         | groupXI      | 1 524 249   | 1 740 602   | -                   |                                                                    |                                         |
|      | Dr-b    | 2440   | 0.54         | 12           | 34 648 802  | 34 673 873  | +                   |                                                                    |                                         |
|      | Ol-b    | 1925   | -0.2         | 19           | 17 578 478  | 17 594 165  | +                   |                                                                    |                                         |
| Tr-b | 1921    | -0.17  | scaffold_130 | 627 432      | 642 255     | +           |                     |                                                                    |                                         |
| Tn-b | 1819    | -0.41  | 2            | 1 421 789    | 1 437 034   | +           |                     |                                                                    |                                         |
| Ga-b | 1145    | -0.78  | groupV       | 4 598 424    | 4 613 708   | +           |                     |                                                                    |                                         |
| C    | Hs      | 13892  | 50           | 12           | 52 618 958  | 52 735 253  | +                   |                                                                    | +C13 +C12 +C11 +C10 +C9 +C8 +C6 +C5 +C4 |
|      | Mmus    | 13295  | 36.52        | 15           | 102 749 222 | 102 864 023 | +                   |                                                                    |                                         |
|      | Mmul    | 12914  | 33.3         | 11           | 51 036 974  | 51 154 580  | +                   |                                                                    |                                         |
|      | Cf      | 12209  | 30.56        | 27           | 4 211 935   | 4 324 857   | -                   |                                                                    |                                         |
|      | Bt      | 11686  | 31.94        | 5            | 16 729 786  | 16 874 969  | -                   |                                                                    |                                         |
|      | Ol      | 7720   | 2.83         | 7            | 12 836 622  | 12 906 049  | +                   |                                                                    |                                         |
|      | Tr      | 7467   | 3.06         | scaffold_66  | 126 560     | 194 602     | +                   |                                                                    |                                         |
|      | Ga      | 7243   | 0.98         | groupXII     | 11 575 429  | 11 648 707  | +                   |                                                                    |                                         |
|      | Tn      | 7224   | 1.67         | 9            | 4 183 940   | 4 253 228   | +                   |                                                                    |                                         |
|      | Xt      | 7062   | 10.24        | scaffold_226 | 280 901     | 464 312     | +                   |                                                                    |                                         |
|      | Dr-a    | 7050   | 4.13         | 23           | 35 634 466  | 35 713 874  | +                   |                                                                    |                                         |
|      | Dr-b    | 1914   | 1.83         | 11           | 1 379 049   | 1 406 538   | +                   |                                                                    |                                         |
|      | Md      | 977    | 3.33         | Un           | 106 218 114 | 106 219 621 | +                   |                                                                    |                                         |
|      | Gg      | 829    | 1.12         | Un_random    | 20 045 123  | 20 048 409  | -                   |                                                                    |                                         |
|      | Gg      | 740    | 0.81         | Un_random    | 11 038 119  | 11 048 409  | -                   |                                                                    |                                         |
|      | Gg      | 579    | 0.31         | Un_random    | 4 242 275   | 4 245 456   | +                   |                                                                    |                                         |
| D    | Hs      | 14000  | 56.7         | 2            | 176 653 084 | 176 763 113 | +                   | -Evx2 +D13 +D12 +D11 +D10 +D9 +D8 +D4 +D3 +D1                      |                                         |
|      | Mmus    | 10726  | 25.99        | 2            | 74 456 458  | 74 565 225  | +                   |                                                                    |                                         |
|      | Mmul    | 10283  | 26.1         | 12           | 39 720 761  | 39 831 755  | +                   |                                                                    |                                         |
|      | Md      | 9379   | 14.91        | 4            | 187 417 681 | 187 538 614 | +                   |                                                                    |                                         |
|      | Cf      | 8278   | 12.88        | 36           | 22 914 522  | 23 023 340  | +                   |                                                                    |                                         |
|      | Bt      | 8093   | 20.14        | 2            | 16 934 939  | 17 086 630  | +                   |                                                                    |                                         |
|      | Xt      | 6880   | 6.81         | scaffold_163 | 534 709     | 664 035     | -                   |                                                                    |                                         |
|      | Gg      | 5683   | 3.28         | 7            | 17 361 528  | 17 447 372  | -                   |                                                                    |                                         |
|      | Dr-a    | 4111   | 1.89         | 9            | 1 553 343   | 1 621 062   | -                   |                                                                    |                                         |
|      | Tr-a    | 3930   | 1.93         | scaffold_100 | 339 085     | 380 283     | -                   |                                                                    |                                         |
|      | Ga-a    | 3922   | 1.99         | groupXVI     | 9 792 262   | 9 840 010   | -                   |                                                                    |                                         |
|      | Tn-a    | 3743   | 1.51         | 2            | 11 075 386  | 11 118 889  | -                   |                                                                    |                                         |
|      | Ol-a    | 3778   | 1.68         | 21           | 24 590 614  | 24 637 174  | +                   |                                                                    |                                         |
|      | Dr-a2   | 2764   | 1.12         | 2            | 12 067 419  | 12 108 344  | +                   |                                                                    |                                         |
|      | Ol-b    | 1586   | 0.45         | 15           | 4 350 793   | 4 374 607   | +                   |                                                                    |                                         |
|      | Tr-b    | 1570   | 0.42         | scaffold_39  | 584 702     | 598 598     | +                   |                                                                    |                                         |
| Ga-b | 1758    | 1.21   | groupVI      | 16 162 358   | 16 182 596  | +           |                     |                                                                    |                                         |
| Tn-b | 1192    | 0      | 17           | 9 576 378    | 9 594 639   | +           |                     |                                                                    |                                         |
