# Supplementary material for: SynBlast: Assisting the analysis of conserved synteny information
Source: Springer Nature journal article supplement (doi:10.1186/1471-2105-9-351), 2008-08-24
Supplement: 12859_2008_2336_MOESM7_ESM.pdf [file 12859_2008_2336_MOESM7_ESM.pdf]

| Drer_chr21 | 36.37 | 36.32 | 36.15 | 36.12 | 33.97 | 33.91 |
|------------|-------|-------|-------|-------|-------|-------|
| Hsap_chr5  |       |       |       |       |       |       |
| IL17B      |       |       |       |       |       |       |
| CSNK1A1    |       |       |       |       |       |       |
| CSNK1A1    |       |       |       |       |       |       |
| NP_001001> |       |       |       |       |       |       |
| PPARGC1B   |       |       |       |       |       |       |
| PDE6A      |       |       |       |       |       |       |
| SLC26A2    |       |       |       |       |       |       |
| TIGD6      |       |       |       |       |       |       |
| SMF_HUMAN  |       |       |       |       |       |       |
| CSF1R      |       |       |       |       | ■     |       |
| 095036_HU> |       |       |       |       |       |       |
| PDGFRB     |       |       |       |       | ■     |       |
| CDX1       |       |       |       |       |       |       |
| SLC6A7     |       |       |       |       |       |       |
| CAMK2A     |       |       |       |       |       | ■     |
| ARSI       |       |       |       |       |       |       |
| TCOF1      |       |       |       |       |       |       |
| CD74       |       |       |       |       |       |       |
| RPS14      | ■     |       |       |       |       |       |
| NDST1      |       | ■     |       |       |       |       |
| SYNPO      |       |       |       |       |       |       |
| MYOZ3/Q96> |       |       |       | ■     |       |       |
| RBM22      |       |       | ■     |       |       |       |
| DCTN4      |       |       |       |       |       |       |
| NM_032947> |       |       |       |       |       |       |
| -/ZNF300   |       |       |       |       |       |       |
| GPX3       |       |       |       |       |       |       |
| GPX3       |       |       |       |       |       |       |
